1 **Title**

2 **Plasma zinc status and hyperinflammatory syndrome in hospitalized**  
3 **COVID-19 patients: an observational study**

4

5 **Authors:** Gil Verschelden<sup>1\*</sup>, Maxim Noeparast<sup>2,3\*</sup>, Maryam Noparast<sup>4</sup>, Mailis  
6 Lauwers<sup>5</sup>, Charlotte Michel<sup>6</sup>, Frédéric Cotton<sup>7</sup>, Cleo Goyvaerts<sup>7</sup>, Maya Hites<sup>1</sup>.

7 \* Shared first authors

8

- 9 1. Clinic of Infectious Diseases, Cliniques Universitaires de Bruxelles (CUB),  
10 Erasme Hospital, Université Libre de Bruxelles (ULB), 1070 Brussels, Belgium
- 11 2. Institute of Molecular Oncology, Member of the German Center for Lung  
12 Research (DZL), Philipps University, 35043 Marburg, Germany
- 13 3. Fonds Wetenschappelijk Onderzoek (FWO) – Vlaanderen
- 14 4. Department of Urologic Sciences, University of British Columbia, Vancouver,  
15 BC, Canada.
- 16 5. Department of Clinical Chemistry, Laboratoire Hospitalier Universitaire de  
17 Bruxelles (LHUB-ULB), Université Libre de Bruxelles (ULB), Brussels,  
18 Belgium
- 19 6. Department of Microbiology, Laboratoire Hospitalier Universitaire de  
20 Bruxelles (LHUB-ULB), Brussels, Belgium
- 21 7. Department of Clinical Chemistry, Laboratoire Hospitalier Universitaire de  
22 Bruxelles (LHUB-ULB), Université Libre de Bruxelles (ULB), Brussels,  
23 Belgium
- 24 8. Laboratory for Molecular and Cellular Therapy (LMCT), Vrije Universiteit  
25 Brussel (VUB), 1090 Brussels, Belgium

26

27 **Corresponding authors:** [Gil.Verschelden@erasme.ulb.ac.be](mailto:Gil.Verschelden@erasme.ulb.ac.be),  
28 [Maxim.Noeparast@staff.uni-marburg.de](mailto:Maxim.Noeparast@staff.uni-marburg.de), and [Maya.Hites@erasme.ulb.ac.be](mailto:Maya.Hites@erasme.ulb.ac.be)

29

### 30 **Abstract**

31 Deficiency of the element zinc is associated with cytokine releasing syndrome (CRS)  
32 and the related acute respiratory distress syndrome as well as impaired antiviral  
33 response. Similar complications associate with severe SARS-CoV-2.

34

35 We conducted a prospective, single-center, observational study in a tertiary  
36 university hospital (CUB-Hopital Erasme, Brussels) to address the zinc status, the  
37 association between the plasma zinc concentration, development of CRS, and the  
38 clinical outcomes in PCR-confirmed and hospitalized COVID-19 patients.

39 One hundred and thirty-nine eligible patients were included between May 2020 and  
40 November 2020 (median age of 65 years [IQR, 54 to 77]).

41 Our cohort's mean plasma zinc concentration was 56.2 µg/dL (standard deviation  
42 [SD], 14.8) compared to 75.7 µg/dL (SD = 18.9 µg/dL) in the retrospective non-  
43 COVID-19 control group (N = 1513;  $P < .001$ ). Markedly, the absolute majority of  
44 patients (96%) were zinc deficient (<80 µg/dL).

45 The mean zinc concentration was lower in patients with CRS compared to those  
46 without CRS (-5 µg/dL; 95% CI, -10.5 to 0.051;  $P = 0.048$ ).

47 Among the tested outcomes, zinc concentration is significantly correlated with only  
48 the length of hospital stay ( $\rho = -0.19$ ;  $P = 0.022$ ), but not with mortality or  
49 morbidity. As such, our findings do not support the role of zinc as a robust prognostic  
50 marker among hospitalized COVID-19 patients who in our cohort presented high  
51 prevalence of zinc deficiency. It might be more beneficial to explore the role of zinc as  
52 a biomarker for assessing the risk of developing a tissue-damaging CRS and

53 predicting outcomes in patients diagnosed with COVID-19 at the early stage of the  
54 disease.

55

56 **Keyword:** SARS-CoV-2, COVID-19, Zinc, cHIS, inflammation

57

58 **Main text**

59 **Introduction**

60 Severe acute respiratory syndrome coronavirus 2 (SARS-CoV-2) is associated with  
61 significant mortality and morbidity in a subgroup of patients who develop cytokine  
62 release syndrome (CRS) and the related acute respiratory distress syndrome  
63 (ARDS)<sup>1,2</sup>.

64

65 Zinc is the second most abundant common trace mineral in humans, yet ~20% of the  
66 global population is estimated to suffer from different degrees of zinc deficiency<sup>3</sup>.

67 Precedent evidence suggests that zinc deficiency also can be associated with lung-  
68 damaging complications such as ARDS<sup>4,5</sup> as well as impaired antiviral response<sup>3,6-9</sup>.

69 For instance, zinc deficiency has shown to be associated with excessive TNF- $\alpha$  and IL-  
70 6 activity, factors known to have a significant role in CRS<sup>9,10</sup>.

71 However, the zinc status and its association with SARS-CoV-2 remains unknown.

72

73 Herein, we designed a study to determine the zinc status, explored the association  
74 between the plasma zinc concentration, the development of CRS, and the clinical  
75 outcomes in hospitalized COVID-19 patients.

76

77 **Methods**

78 We conducted a prospective, single-center, observational study in a tertiary  
79 university hospital (CUB-Hôpital Erasme, Brussels) between May 2020 and  
80 November 2020. Consecutive hospitalized adult patients with PCR-confirmed SARS-  
81 CoV-2 infection were enrolled after obtaining informed consent. We performed  
82 clinical and laboratory assessments within 72 hours of admission. An atomic  
83 absorption spectroscopy technique was used to measure zinc concentrations in the  
84 plasma<sup>11</sup>.

85 Plasma zinc concentrations of COVID-19 patients were compared with our  
86 retrospective cohort of 1513 adult non-COVID-19 patients whose plasma zinc was  
87 previously measured in our center. The patients were selected regardless of gender or  
88 comorbidity during 2018.

89

90 The severity of COVID-19 was assessed daily during the course of hospitalization  
91 using the WHO 10-point system<sup>12</sup>.

92 Individual inflammatory parameters were assessed and summed on the day of  
93 patients' study inclusion according to an additive six-point clinical scale, developed  
94 and validated by Webb et al.<sup>13</sup>, to determine the presence and severity of COVID-19-  
95 associated hyperinflammatory syndrome (cHIS)<sup>11</sup>. Although the authors reported an  
96 excellent discrimination<sup>14</sup> of the maximum daily cHIS score for both in-hospital  
97 mortality and mechanical ventilation, external validation was still lacking. As part of  
98 this study, we independently evaluated the relevance of the cHIS scoring system and  
99 determined the best cut-offs in our cohort.

100

101 We defined the clinical outcomes as the length of hospitalization, the incidence of  
102 mechanical ventilation (including invasive and non-invasive ventilation), and

103 mortality. We recorded the outcomes with a follow-up of 90 days from hospital  
104 admission.

105

### 106 **Baseline characteristics and patients' outcomes**

107 One hundred and thirty-nine eligible patients were included. The patient  
108 characteristics and laboratory assessments are summarized in Table and Figure 1.

109

110 The participants were predominantly male (91/139, 65%) with a median age of 65  
111 years (interquartile range [IQR], 54 to 77). Ninety-six patients (69%) had two or  
112 more comorbidities. The median body mass index (BMI) was 27 kg/m<sup>2</sup> and 93/135  
113 (69%) patients had a BMI >25 kg/m<sup>2</sup>, among which 41/135 (30%) patients were  
114 considered obese (BMI >30 kg/m<sup>2</sup>). The median time from symptoms onset to  
115 inclusion was eight days (IQR, 6 to 12).

116 The median worst daily WHO severity score was 4 (IQR, 4 to 6). Forty-two patients  
117 (30%) required mechanical ventilation or deceased during their hospitalization  
118 (WHO score >5, severe COVID-19)<sup>10</sup>.

119 Nineteen patients (14%) were admitted to the intensive care unit (ICU) during their  
120 hospital stay. Twenty patients (14%) deceased within 90 days of admission, of whom  
121 seven (35%) had been admitted to ICU.

122

### 123 **Zinc status and its association with patients' outcomes**

124 The mean plasma zinc concentration in our cohort was 56.2 µg/dL (SD = 14.8)  
125 compared to 75.7 µg/dL (SD = 18.9 µg/dL) in the control group. An unpaired t-test  
126 with unequal variance (Welch's t-test) confirms that this difference is significant (*P*  
127 <.001).

128 Markedly, the absolute majority of COVID-19 patients (96%) were zinc deficient  
129 (<80µg/dL).

130

131 We observed that the plasma zinc concentration is weakly but significantly correlated  
132 ( $\rho = -0.19$ ;  $P = 0.022$ ) with the length of hospital stay. However, the plasma zinc  
133 concentration was not significantly associated with the risk of mortality or morbidity  
134 (Table 2b). Still, the mean plasma zinc levels were systematically lower in  
135 mechanically ventilated- compared to non-mechanically ventilated COVID-19 cases (-  
136 5.23 µg/dL; 95% confidence interval [CI], -10.57 to 0.13;  $P = 0.058$ ), and in dead  
137 compared to surviving participants (-6.68 µg/dL; 95% CI, -13.68 to 0.33;  $P = 0.065$ ).

138

### 139 **External validation of the cHIS score as the measure of inflammatory** 140 **status**

141 The area under the receiver operating characteristic curve (AUROC) for mechanical  
142 ventilation and mortality was 0.687 and 0.674, respectively, which indicates a lack of  
143 discrimination capacity ( $AUC \leq 0.7^{14}$ ). Nevertheless, according to the results of the  
144 Hosmer-Lemeshow goodness of fit test<sup>14</sup>, the score demonstrated a good calibration  
145 (p-value > 0.05), with p-values of 0.681 and 0.649 for mechanical ventilation and  
146 mortality, respectively.

147 Next, we aimed to identify a cHIS cut-off, which corresponds to CRS, to define a  
148 binary (low- and high-risk for poor outcome) patient group regarding inflammatory  
149 status. Our data corroborate with the cut-off suggested by Webb et al.<sup>11</sup>,  
150 demonstrating the best performance (Youden's J statistic closest to one) at a  
151 threshold of  $\geq 2^{15}$ .

152 In our cohort, 74/134 (55%) patients had a cHIS score  $\geq 2$ . Importantly, greater  
153 proportions of these cases needed mechanical ventilation (30/74, 40%) and died

154 (16/74, 22%) compared to patients with cHIS scores  $< 2$  (11/60, 18%;  $P = 0.006$ ) and  
155 (4/60, 7%;  $P = 0.013$ ) respectively.

156

157 Although our results support the association of CRS with both severe COVID-19 and  
158 mortality, unlike Webb et al., we were not able to demonstrate an excellent  
159 discrimination capacity of the cHIS score in our cohort<sup>13</sup>. In contrast to that study,  
160 most of our patients (108/139, 78%) had received immunomodulatory or suppressive  
161 therapies just before the laboratory evaluation (as part of our standard of care and  
162 based upon WHO guidelines and findings of the Recovery trial<sup>16</sup>). Dexamethasone  
163 reduces CRS and improves the outcome while inevitably lowers the cHIS score<sup>16</sup>. The  
164 cHIS score is probably more appropriate to identify high-risk patients in ambulatory  
165 practice or among the hypoxemic and dexamethasone-naïve patients.

166

#### 167 **Association of plasma zinc concentration and cHIS score**

168 We were not able to show a significant association between plasma zinc levels and the  
169 development of CRS (defined as cHIS score  $\geq 2$ ) in our cohort.

170 The mean concentration of plasma zinc was lower in patients with CRS compared to  
171 those without CRS (-5  $\mu\text{g}/\text{dL}$ ; 95% CI, -10.5 to 0.051;  $P = 0.048$ ). However, with  
172 stringent and conservative Bonferroni adjustment, the results were not statistically  
173 significant.

174

#### 175 **Discussion and limitations of the study**

176 The small sample size and lack of a comparable control group (hospitalized for other  
177 reasons than COVID-19) are the major limitations.

178 Additionally, as the absolute majority of the patients were zinc deficient, no room was  
179 left for any comparison between zinc deficient and non-existing zinc sufficient  
180 patients.

181

## 182 **Conclusions**

183 To the best of our knowledge, we report for the first time that an absolute majority of  
184 hospitalized COVID-19 patients are zinc deficient.

185 We find a weak (reverse) correlation between plasma zinc concentration and the  
186 length of hospital stay, but not with mortality or morbidity.

187 We independently validated cHIS as a score of COVID-19 severity, but we found no  
188 significant association between zinc plasma concentration and cHIS among patients  
189 who are almost all zinc deficient.

190 As such, our findings do not support the role of zinc as a robust prognostic factor  
191 among hospitalized COVID-19 patients.

192 We recommend zinc to be measured prospectively in a larger, non-COVID-19  
193 population to assess the incidence of the disease and CRS occurrence and its related  
194 outcomes in zinc-deficient versus zinc-sufficient individuals.

195 We encourage further studies to explore the role of zinc as a biomarker for assessing  
196 the risk of developing a tissue-damaging CRS and predicting outcomes in patients  
197 diagnosed with COVID-19.

198

## 199 **Abbreviations**

|     |       |                                                        |
|-----|-------|--------------------------------------------------------|
| 200 | ARDS  | Acute respiratory distress syndrome                    |
| 201 | AUROC | Area under the receiver operating characteristic curve |
| 202 | BMI   | Body mass index                                        |
| 203 | cHIS  | COVID-19-associated hyperinflammatory syndrome         |



|     |            |                                                 |
|-----|------------|-------------------------------------------------|
| 204 | CI         | Confidence interval                             |
| 205 | CRS        | Cytokine release syndrome                       |
| 206 | ICU        | Intensive care unit                             |
| 207 | IQR        | Interquartile range                             |
| 208 | SARS-CoV-2 | severe acute respiratory syndrome coronavirus 2 |
| 209 | SD         | Standard deviation                              |

210

### 211 **Ethics approval and consent to participate**

212 Informed consent was obtained from all participants. The study was approved by the  
213 ethics committee of Erasme Hospital, EC identifier P2020/261.

214

### 215 **Availability of data and materials**

216 The datasets used and/or analysed during the current study are available from the  
217 corresponding author on reasonable request.

218

219 **Conflict of interest and funding:** We hereby confirm that there is no conflict of  
220 interest associated with this publication and that this work did not receive any  
221 financial support that could have influenced its outcome.

222

### 223 **Author contributions**

224 G.V and M.Noep: conceived the idea, co-authored the research proposal, designed  
225 the study, analyzed the data, interpreted the results, generated the tables, and co-  
226 authored the manuscript. G.V: medical consultation and handling the patients'  
227 material. M.Noep: supervised the study design and the statistical analyses and  
228 critically revised and contributed to drafting the manuscript. M.L, C.M, F.C: handled  
229 the patients' material and performed the laboratory assessments. C.G: contributed to

230 drafting the research proposal and study design. M.H: supervised all stages of the  
231 study, including the proposal and the study design, and critically revised and  
232 contributed to drafting the manuscript. All authors revised and approved the  
233 manuscript.

234

## 235 **Acknowledgments**

236 Special thanks to Prof.Dr. Frédérique Jacobs (Université Libre de Bruxelles, Erasme  
237 Hospital).

238

## 239 **References**

- 240 1. Leisman, D. E. *et al.* Cytokine elevation in severe and critical COVID-19: a  
241 rapid systematic review, meta-analysis, and comparison with other  
242 inflammatory syndromes. *Lancet. Respir. Med.* **8**, 1233–1244 (2020).
- 243 2. Chen, L. Y. C., Hoiland, R. L., Stukas, S., Wellington, C. L. & Sekhon, M. S.  
244 Confronting the controversy: interleukin-6 and the COVID-19 cytokine storm  
245 syndrome. *Eur. Respir. J.* **56**, 2003006 (2020).
- 246 3. Read, S. A., Obeid, S., Ahlenstiel, C. & Ahlenstiel, G. The Role of Zinc in  
247 Antiviral Immunity. *Adv. Nutr.* **10**, 696–710 (2019).
- 248 4. Boudreault, F. *et al.* Zinc deficiency primes the lung for ventilator-induced  
249 injury. *JCI insight* **2**, (2017).
- 250 5. Wessels, I. *et al.* Zinc supplementation ameliorates lung injury by reducing  
251 neutrophil recruitment and activity. *Thorax* **75**, 253–261 (2020).
- 252 6. Asl, S. H., Nikfarjam, S., Majidi Zolbanin, N., Nassiri, R. & Jafari, R.  
253 Immunopharmacological perspective on zinc in SARS-CoV-2 infection. *Int.*  
254 *Immunopharmacol.* **96**, 107630 (2021).
- 255 7. Noeparast, A.; Verschelden, G.; Degeyter, D.; Marco, M.; Goyvaerts, C.; Hites,

- 256 M. In Light of the SARS-CoV-2 Pandemic: Revisit of the Evidence Associating  
257 Zinc and Anti-viral Response. Preprints 2020, 2020040094. In Light of the  
258 SARS-CoV-2 Pandemic: Revisit of the Evidence Associating Zinc and Anti-viral  
259 Response. *Preprints* **2020040094**, (2020).
- 260 8. Prasad, A. S. Zinc in human health: effect of zinc on immune cells. *Mol. Med.*  
261 **14**, 353–357 (2008).
- 262 9. Prasad, A. S. *et al.* Zinc supplementation decreases incidence of infections in  
263 the elderly: effect of zinc on generation of cytokines and oxidative stress. *Am.*  
264 *J. Clin. Nutr.* **85**, 837–844 (2007).
- 265 10. Mehta, P. *et al.* COVID-19: consider cytokine storm syndromes and  
266 immunosuppression. *Lancet (London, England)* (2020) doi:10.1016/S0140-  
267 6736(20)30628-0.
- 268 11. Davies, I. J., Musa, M. & Dormandy, T. L. Measurements of plasma zinc. I. In  
269 health and disease. *J. Clin. Pathol.* **21**, 359–363 (1968).
- 270 12. A minimal common outcome measure set for COVID-19 clinical research.  
271 *Lancet. Infect. Dis.* **20**, e192–e197 (2020).
- 272 13. Webb, B. J. *et al.* Clinical criteria for COVID-19-associated hyperinflammatory  
273 syndrome: a cohort study. *Lancet. Rheumatol.* **2**, e754–e763 (2020).
- 274 14. Hosmer, D. W. & Lemeshow, S. *Applied Logistic Regression Second Edition.*  
275 *Applied Logistic Regression* (2004).
- 276 15. YODEN, W. J. Index for rating diagnostic tests. *Cancer* **3**, 32–35 (1950).
- 277 16. Horby, P. *et al.* Dexamethasone in Hospitalized Patients with Covid-19. *N.*  
278 *Engl. J. Med.* **384**, 693–704 (2021).
- 279
- 280

| <b>Table 1: Characteristics of study cohort (N=139)</b>       | <b>No. Available</b> | <b>Value</b> |
|---------------------------------------------------------------|----------------------|--------------|
| <b>Age (yr), median [IQR]</b>                                 | 139                  | 65 [54-77]   |
| <b>Gender - N (%)</b>                                         | 139                  |              |
| Female                                                        |                      | 48 (34)      |
| Male                                                          |                      | 91 (65)      |
| <b>BMI (kg/m<sup>2</sup>), median [IQR]</b>                   | 135                  | 27,2 [23-48] |
| Overweight (BMI≥25)                                           |                      | 52 (38)      |
| Obese (BMI≥30)                                                |                      | 41 (30)      |
| <b>Smoking status, N (%)</b>                                  |                      |              |
| Never                                                         |                      | 97 (70)      |
| Former                                                        |                      | 35 (25)      |
| Current                                                       |                      | 7 (5)        |
| <b>Number of coexisting conditions, N (%)</b>                 | 139                  |              |
| 0                                                             |                      | 5 (4)        |
| 1                                                             |                      | 19 (14)      |
| 2                                                             |                      | 19 (14)      |
| >2                                                            |                      | 96 (69)      |
| <b>Coexisting conditions, N (%)</b>                           | 139                  |              |
| Hypertension                                                  |                      | 90 (65)      |
| Diabetes                                                      |                      | 50 (36)      |
| Hypercholesterolemia                                          |                      | 54 (39)      |
| Obstructive sleep apnea syndrome                              |                      | 11 (8)       |
| Obstructive lung diseases                                     |                      | 25 (18)      |
| Coronary artery disease                                       |                      | 19 (14)      |
| Congestive heart failure                                      |                      | 23 (16)      |
| Atrial fibrillation                                           |                      | 14 (10)      |
| Chronic liver disease                                         |                      | 4 (3)        |
| Chronic kidney disease                                        |                      | 31 (22)      |
| Malign neoplasm                                               |                      | 9 (6)        |
| Immune suppression                                            |                      | 25 (18)      |
| Neurological nonvascular                                      |                      | 12 (9)       |
| Stroke                                                        |                      | 8 (6)        |
| <b>Days with symptoms before inclusion, median [IQR]</b>      | 131                  | 8 [6-12]     |
| <b>Days of hospitalization before inclusion, median [IQR]</b> | 139                  | 1 [1-2]      |
| <b>COVID-19 medical therapy before inclusion</b>              | 139                  | 108 (78)     |
| Hydroxychloroquine                                            |                      | 9 (6)        |
| Dexamethasone                                                 |                      | 99 (71)      |
| <b>Severity of COVID-19 (worst WHO score)</b>                 | 139                  |              |
| Median WHO score [IQR]                                        |                      | 4 [4-6]      |
| With score >5 (severe disease), N (%)                         |                      | 42 (30)      |
| <b>cHIS score at inclusion</b>                                | 134                  |              |
| Median [IQR]                                                  |                      | 2 [1-2]      |
| With cHIS score ≥2, N (%)                                     |                      | 74 (55)      |
| <b>Plasma zinc (Normal range: [80-120µg/dL])</b>              | 139                  |              |
| Mean level (SD)                                               |                      | 56.2 (14.8)  |
| With zinc deficiency, N (%)                                   |                      | 133 (96)     |

Note: IQR = interquartile range, CI = confidence interval, OR = odds ratio

**Table 2a: Outcomes at 90-days (N=139)**

|                                              | Value    |
|----------------------------------------------|----------|
| Length of hospital stay (days), median [IQR] | 8 [5-13] |
| Mechanical ventilation, N (%)                | 42 (30)  |
| ICU admission, N (%)                         | 19 (14)  |
| Deceased, N (%)                              | 20 (14)  |

**Table 2b: Association of outcomes and plasma zinc level (N=139)**

|                                        | Value                                                                   |
|----------------------------------------|-------------------------------------------------------------------------|
| Length of hospital stay and zinc level | Correlation coefficient (95% CI) = -0.19 (-0.35-0.03), $p = 0.022^{**}$ |
| Mechanical ventilation and zinc level  | OR (95% CI) = 0.98 (0.95-1.00), $p = 0.058^{***}$                       |
| Mortality and zinc level               | OR (95% CI) = 0.97 (0.94-1.00), $p = 0.065^{***}$                       |

Note:  
 IQR = interquartile range, CI = confidence interval, OR = odds ratio  
 $**$  Spearman correlation  
 $***$  Logistic regression

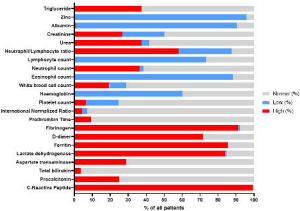

Source: https://www.medrxiv.org/content/10.1101/2021.06.09.21258271v2.full.pdf
